# Supplementary material for: TGF-β is an inducer of ZEB1-dependent mesenchymal transdifferentiation in glioblastoma that is associated with tumor invasion
Source: PubMed Central journal article supplement (PMC4649508; doi:10.1038/cddis.2014.395), 2014-10-02

Supplementary Figure 6.

a

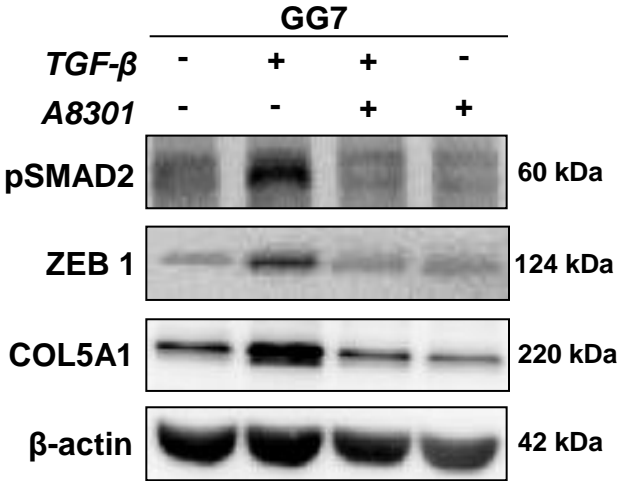

b

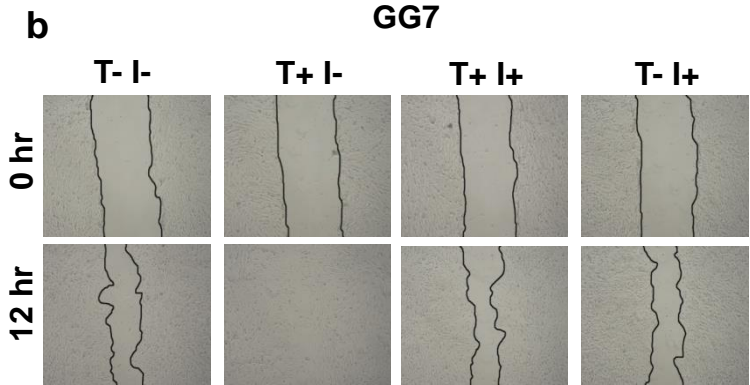

c

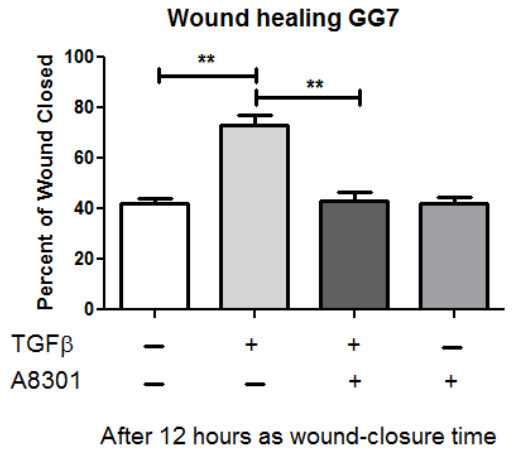

Supplement: cddis2014395x6.pdf [file cddis2014395x6.pdf]
